# Supplementary material
Source: PubMed Central journal article supplement (PMC6240856)
Supplement: supp_RA118.002691_136353_2_supp_193545_pn8nt3.pdf [file supp_RA118.002691_136353_2_supp_193545_pn8nt3.pdf]

**Figure S2**

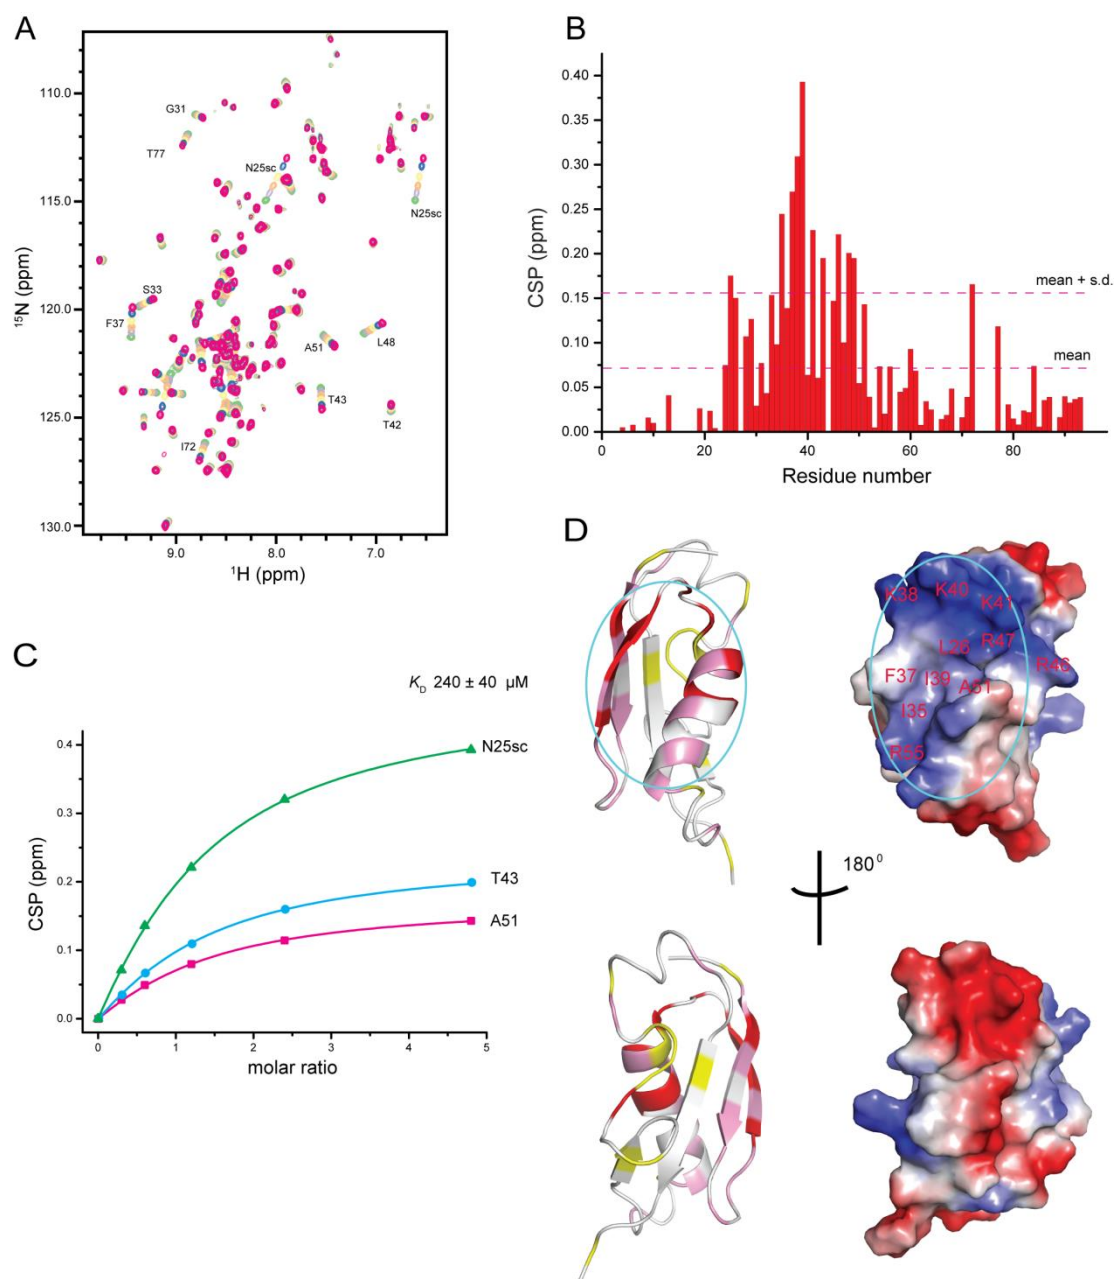

**Figure S2.** Titration of SMT3 with the Ssa1 C-terminal peptide (PEAEGPTVEEVD). (A)  $^1\text{H}$ - $^{15}\text{N}$  HSQC spectra of SMT3 titrated with the peptide at ratios of 1:0, 1:0.3, 1:0.6, 1:1.2, 1:2.4, and 1:4.8. (B) Bar diagram of CSP versus residue number of SMT3 in (A). (C) Fitting of CSP data using the backbone NH signals of T43 and A51, together with the sidechain NH signal of N25, in order to obtain the  $K_D$ . (D) Mapping of the CSP results in (B) onto the SMT3 structure. The binding site with largest CSP values is circled in the ribbon and electrostatic potential surface models (PDB id 1L2N). Red,  $\text{CSP} \geq \text{mean} + \text{s.d.}$  in (B); pink,  $\text{mean} + \text{s.d.} > \text{CSP} \geq \text{mean}$  in (B); while,  $\text{mean} > \text{CSP}$ ; yellow, proline and unassigned residues.

**Figure S3**

**A**

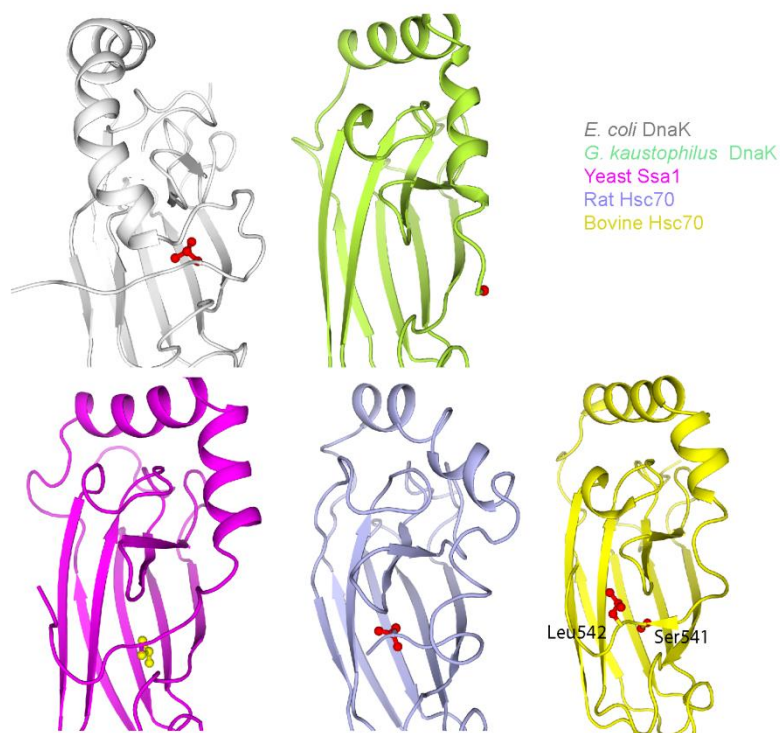

**B**

|                                    | 510     | αA            | αB          | 554                    |       |        |                      |     |           |
|------------------------------------|---------|---------------|-------------|------------------------|-------|--------|----------------------|-----|-----------|
| Yeast Ssa1                         | TNDKGR  | LSKEDI        | EKMVAEAEKFK | EEDEKESQRIASKNQLESIAYS |       |        |                      |     |           |
| Bovine Hsc70 (1YUW)                | TNDKGR  | LSKEDI        | ERMVQEA     | EAEKYKA                | EDEKQ | RD     | KVSSKNSLESYAFNMKATVE |     |           |
| Rat Hsc70 (1CKR)                   | TNDKGR  | LSKEDI        | ERMVQEA     | EAEKYKA                | EDEKQ | RD     | KVSSKNSLE            |     |           |
| <i>G. kaustophilus</i> DnaK (2V7Y) | KSSSG-  | LSEEEI        | QRM         | KEAEENAE               | ADRKR | KEAAEL | RNEAD                |     |           |
| <i>E. coli</i> DnaK (1BPR)         | KASSG-  | LNEDEI        | QK          | MVRDAE                 | ANAE  | ADRK   | FEELVQTRNQG          | DHL | LHSTRKQVE |
|                                    | . . . * | * . . . . . * | * : : : : * | : **                   |       | * . *  | :                    |     |           |

**Figure S3.** Comparison of structures of different Hsp70 SBD $\beta$  truncations (A) and sequence alignment of C-terminal sequences of these constructs (B). Leu542 in yeast Ssa1 (together with other corresponding residues in the homologue proteins) are displayed as ball/stick in (A), and colored red in (B). Secondary structure is labeled according to the structure of yeast Ssa1 SBD (382-554).

**Figure S4**

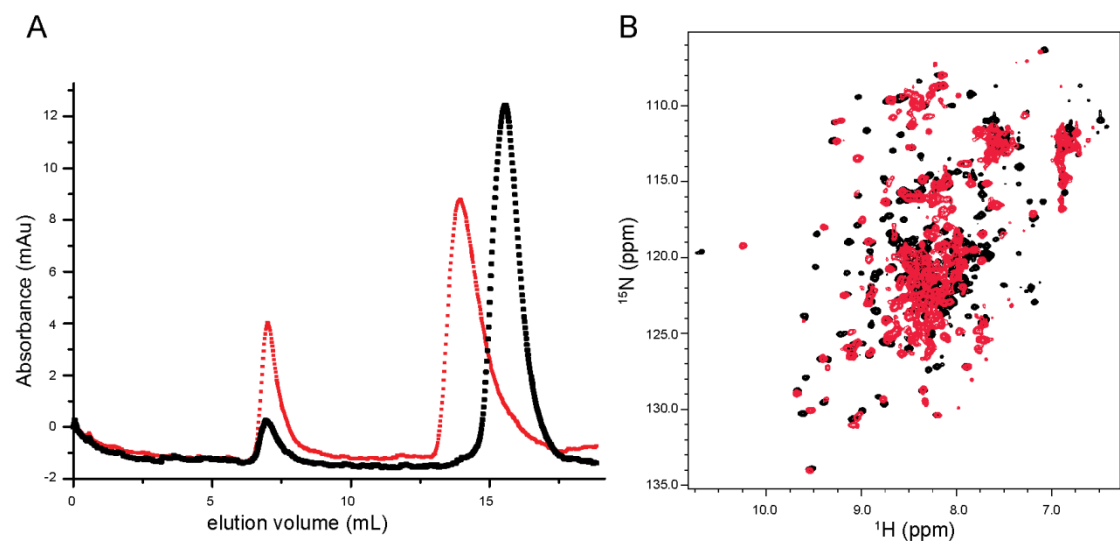

**Figure S4.** Oligomerization of Ssa1 SBD (382-506). (A) Elution profile of Ssa1 SBD (382-506) (red) and SBD (382-554) (black). (B)  $^1\text{H}$ - $^{15}\text{N}$  spectra of Ssa1 SBD (382-506) (red) and SBD (382-554) (black).
